# Supplementary material
Source: Springer Nature journal article supplement (https://www.springermedizin.de/resource/supplementary/12939_2013_369_MOESM3_ESM.pdf/9551010)

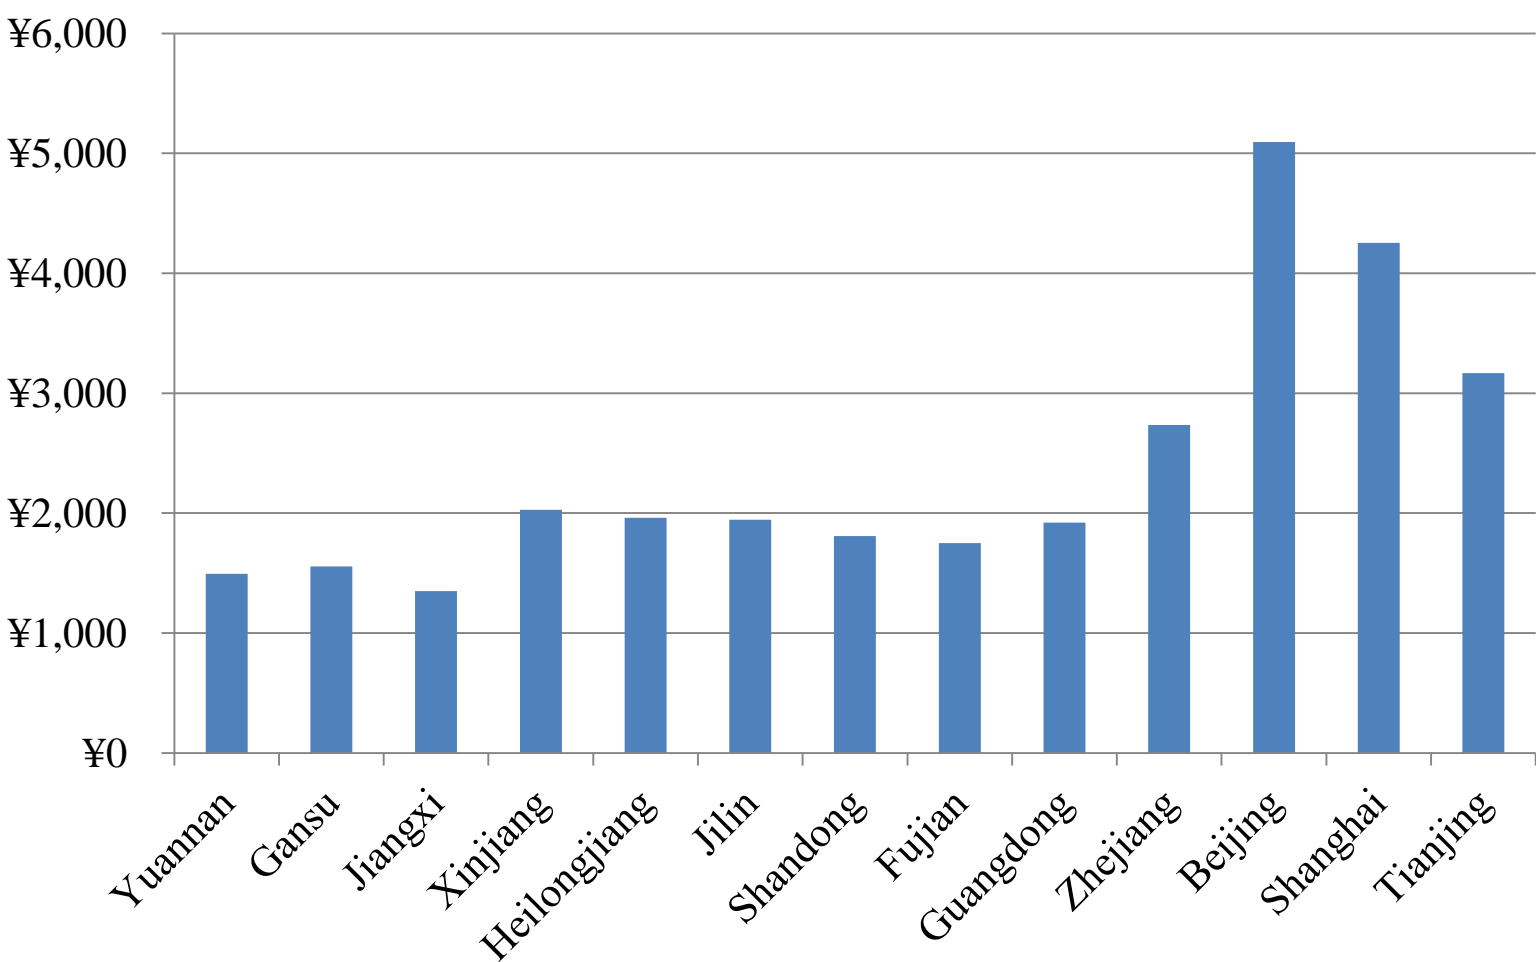

**Poorest to the Richest provinces (by GDP per capita)**

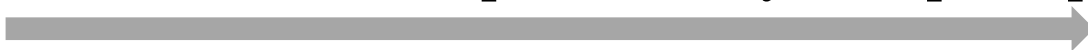

Supplement: MOESM3 [file 9551010]
